# Supplementary material for: Spider Toxin SNX-482 Gating Modifier Spontaneously Partitions in the Membrane Guided by Electrostatic Interactions
Source: Preprints.org preprint supplement (doi:10.20944/preprints202112.0496.v1), 2021-12-31
Supplement: Supplementary file 1 [file supplementary]

**Table S1. Diffusion coefficients of different lipid compositions were calculated in the simulation versus their extrapolation to the infinite box size.**

| Lipids          | Water<br>viscosity $\eta_f$<br>(Poise) | Membrane<br>viscosity $\eta_m$<br>(Poise cm) | Interleaflet<br>coupling $b$<br>(Poise/cm) | $D^{\text{sim}}$ (cm <sup>2</sup> /s) | $D^\infty$ (cm <sup>2</sup> /s) |
|-----------------|----------------------------------------|----------------------------------------------|--------------------------------------------|---------------------------------------|---------------------------------|
| POPC            | 0.00311                                | $0.3 \times 10^{-7}$                         | $0.1 \times 10^{-7}$                       | $1.5 \times 10^{-7}$                  | $5.1 \times 10^{-7}$            |
|                 | 0.00311                                | $2.3 \times 10^{-7}$                         | $1.0 \times 10^{-7}$                       |                                       | $1.0 \times 10^{-7}$            |
|                 | 0.00311                                | $4.3 \times 10^{-7}$                         | $10 \times 10^{-7}$                        |                                       | $0.6 \times 10^{-7}$            |
|                 | 0.0089                                 | $0.3 \times 10^{-7}$                         | $0.1 \times 10^{-7}$                       |                                       | $4.0 \times 10^{-7}$            |
|                 | 0.0089                                 | $2.3 \times 10^{-7}$                         | $1.0 \times 10^{-7}$                       |                                       | $0.9 \times 10^{-7}$            |
|                 | 0.0089                                 | $4.3 \times 10^{-7}$                         | $10 \times 10^{-7}$                        |                                       | $0.5 \times 10^{-7}$            |
| POPC:POPG (3:1) | 0.00311                                | $0.3 \times 10^{-7}$                         | $0.1 \times 10^{-7}$                       | $1.6 \times 10^{-7}$                  | $5.2 \times 10^{-7}$            |
|                 | 0.00311                                | $2.3 \times 10^{-7}$                         | $1.0 \times 10^{-7}$                       |                                       | $1.0 \times 10^{-7}$            |
|                 | 0.00311                                | $4.3 \times 10^{-7}$                         | $10 \times 10^{-7}$                        |                                       | $0.6 \times 10^{-7}$            |
|                 | 0.0089                                 | $0.3 \times 10^{-7}$                         | $0.1 \times 10^{-7}$                       |                                       | $4.0 \times 10^{-7}$            |
|                 | 0.0089                                 | $2.3 \times 10^{-7}$                         | $1.0 \times 10^{-7}$                       |                                       | $0.9 \times 10^{-7}$            |
|                 | 0.0089                                 | $4.3 \times 10^{-7}$                         | $10 \times 10^{-7}$                        |                                       | $0.5 \times 10^{-7}$            |
| POPC:POPG (1:1) | 0.00311                                | $0.3 \times 10^{-7}$                         | $0.1 \times 10^{-7}$                       | $1.3 \times 10^{-7}$                  | $5.0 \times 10^{-7}$            |
|                 | 0.00311                                | $2.3 \times 10^{-7}$                         | $1.0 \times 10^{-7}$                       |                                       | $1.0 \times 10^{-7}$            |
|                 | 0.00311                                | $4.3 \times 10^{-7}$                         | $10 \times 10^{-7}$                        |                                       | $0.6 \times 10^{-7}$            |
|                 | 0.0089                                 | $0.3 \times 10^{-7}$                         | $0.1 \times 10^{-7}$                       |                                       | $3.9 \times 10^{-7}$            |
|                 | 0.0089                                 | $2.3 \times 10^{-7}$                         | $1.0 \times 10^{-7}$                       |                                       | $0.9 \times 10^{-7}$            |
|                 | 0.0089                                 | $4.3 \times 10^{-7}$                         | $10 \times 10^{-7}$                        |                                       | $0.5 \times 10^{-7}$            |
| POPC:POPG (1:3) | 0.00311                                | $0.3 \times 10^{-7}$                         | $0.1 \times 10^{-7}$                       | $1.5 \times 10^{-7}$                  | $5.1 \times 10^{-7}$            |
|                 | 0.00311                                | $2.3 \times 10^{-7}$                         | $1.0 \times 10^{-7}$                       |                                       | $1.0 \times 10^{-7}$            |
|                 | 0.00311                                | $4.3 \times 10^{-7}$                         | $10 \times 10^{-7}$                        |                                       | $0.6 \times 10^{-7}$            |
|                 | 0.0089                                 | $0.3 \times 10^{-7}$                         | $0.1 \times 10^{-7}$                       |                                       | $4.0 \times 10^{-7}$            |
|                 | 0.0089                                 | $2.3 \times 10^{-7}$                         | $1.0 \times 10^{-7}$                       |                                       | $0.9 \times 10^{-7}$            |
|                 | 0.0089                                 | $4.3 \times 10^{-7}$                         | $10 \times 10^{-7}$                        |                                       | $0.5 \times 10^{-7}$            |
| POPG            | 0.00311                                | $0.3 \times 10^{-7}$                         | $0.1 \times 10^{-7}$                       | $1.4 \times 10^{-7}$                  | $5.1 \times 10^{-7}$            |
|                 | 0.00311                                | $2.3 \times 10^{-7}$                         | $1.0 \times 10^{-7}$                       |                                       | $1.0 \times 10^{-7}$            |
|                 | 0.00311                                | $4.3 \times 10^{-7}$                         | $10 \times 10^{-7}$                        |                                       | $0.6 \times 10^{-7}$            |
|                 | 0.0089                                 | $0.3 \times 10^{-7}$                         | $0.1 \times 10^{-7}$                       |                                       | $4.0 \times 10^{-7}$            |
|                 | 0.0089                                 | $2.3 \times 10^{-7}$                         | $1.0 \times 10^{-7}$                       |                                       | $0.9 \times 10^{-7}$            |
|                 | 0.0089                                 | $4.3 \times 10^{-7}$                         | $10 \times 10^{-7}$                        |                                       | $0.5 \times 10^{-7}$            |

Parameters used in the extrapolation a Water height \* H (nm) = 4, System lateral size L (nm) = 12 and Hydrodynamic radius R (nm) = 0.47<sup>1</sup>.

<sup>1</sup>. Venable, R.M.; Ingólfsson, H.I.; Lerner, M.G.; Perrin, B.S.; Camley, B.A.; Marrink, S.J.; Brown, F.L.H.; Pastor, R.W. Lipid and Peptide Diffusion in Bilayers: The Saffman–Delbrück Model and Periodic Boundary Conditions. *J. Phys. Chem. B* **2017**, *121*, 3443–3457, doi:10.1021/acs.jpcb.6b09111.

**Table S2. Diffusion coefficients of SNX-482 in POPC: POPG (3:1) membrane calculated by extrapolation to the infinite box size.**

| toxin-<br>membrane         | Water<br>height<br>(nm) | System<br>lateral<br>size<br>(nm) | Water<br>viscosity $\eta_f$<br>(Poise) | Membrane<br>viscosity $\eta_m$<br>(Poise cm) | Interleaflet<br>coupling b<br>(Poise/cm) | Hydrodynam-<br>ic radius R<br>(nm) | $D^{sim}$<br>(cm <sup>2</sup> /s) | $D_\infty$<br>(cm <sup>2</sup> /s) |
|----------------------------|-------------------------|-----------------------------------|----------------------------------------|----------------------------------------------|------------------------------------------|------------------------------------|-----------------------------------|------------------------------------|
| SNX-482 POPC:POPG<br>(3:1) | 6                       | 16                                | 0.00311                                | $0.3 \times 10^{-7}$                         | $0.1 \times 10^{-7}$                     | 1.08                               | $4.1 \times 10^{-8}$              | $2.96 \times 10^{-7}$              |
|                            |                         |                                   | 0.00311                                | $2.3 \times 10^{-7}$                         | $1.0 \times 10^{-7}$                     |                                    |                                   | $1.06 \times 10^{-7}$              |
|                            |                         |                                   | 0.00311                                | $4.3 \times 10^{-7}$                         | $10 \times 10^{-7}$                      |                                    |                                   | $0.66 \times 10^{-7}$              |
|                            |                         |                                   | 0.0089                                 | $0.3 \times 10^{-7}$                         | $0.1 \times 10^{-7}$                     |                                    |                                   | $1.87 \times 10^{-7}$              |
|                            |                         |                                   | 0.0089                                 | $2.3 \times 10^{-7}$                         | $1.0 \times 10^{-7}$                     |                                    |                                   | $0.89 \times 10^{-7}$              |
|                            |                         |                                   | 0.0089                                 | $4.3 \times 10^{-7}$                         | $10 \times 10^{-7}$                      |                                    |                                   | $0.56 \times 10^{-7}$              |

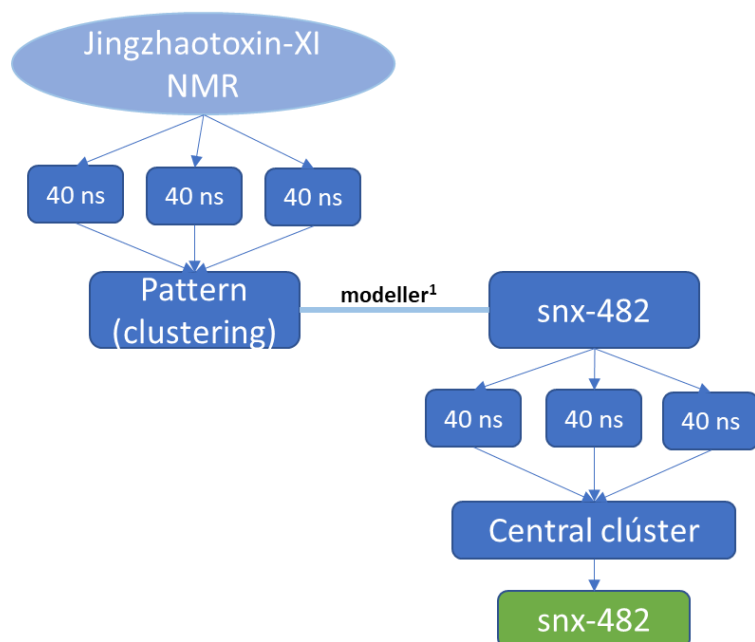

**Figure S1. Comparative modeling scheme SNX-482.** We randomly selected 3 PDB from Jingzhaotoxin-XI (Id: 2A2V) to perform independent 40 ns all-atom MD simulations. Afterward, we carried out comparative modeling with the central cluster of the simulations to produce 100 comparative models of SNX-482. We randomly selected 3 SNX-482 models and performed 40 ns all-atom MD simulations. The final SNX-482 comparative model corresponds to the central cluster of these simulations.

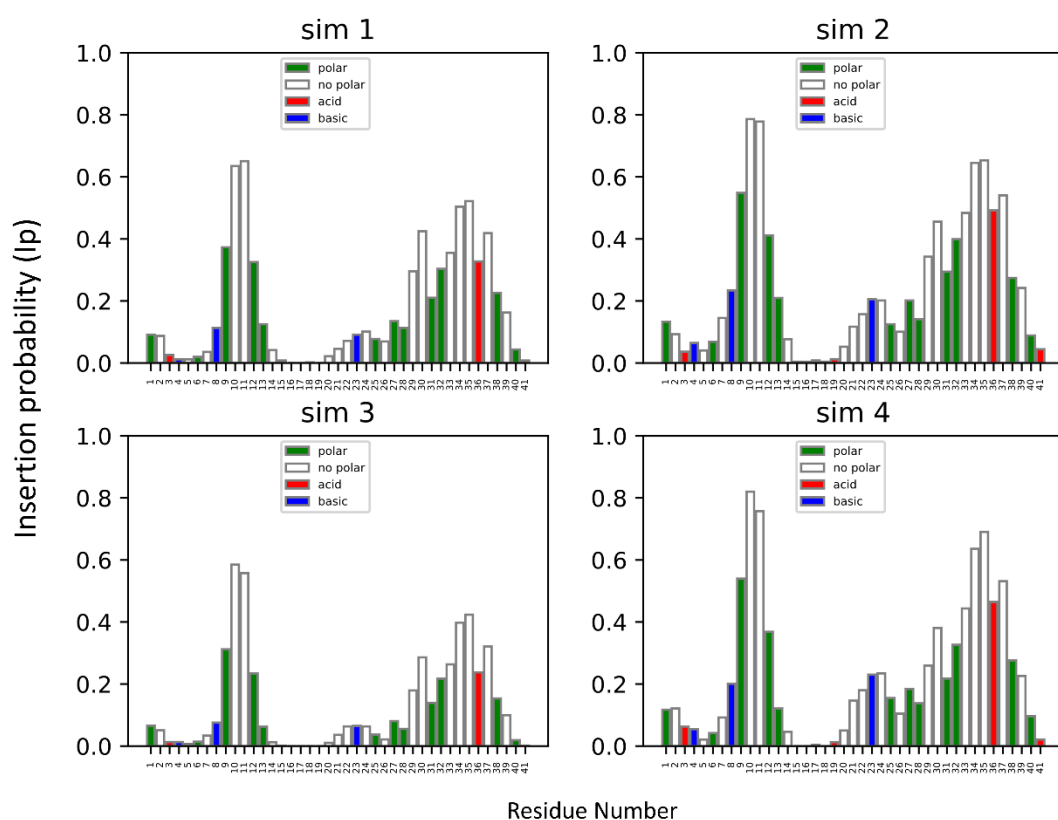

Figure S2. Insertions probability for each CG simulation of SNX-482 in POPC: POPG (1:1).

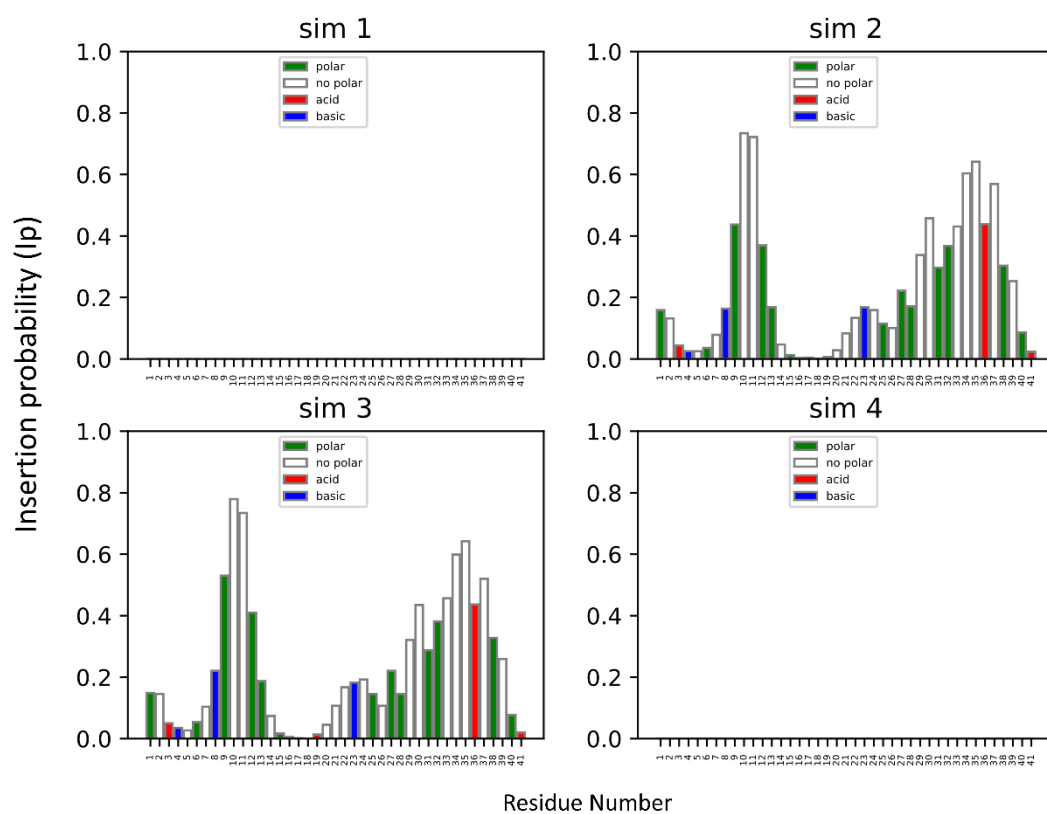

Figure S3. Insertions probability for each CG simulation of SNX-482 in POPC: POPG (1:3).

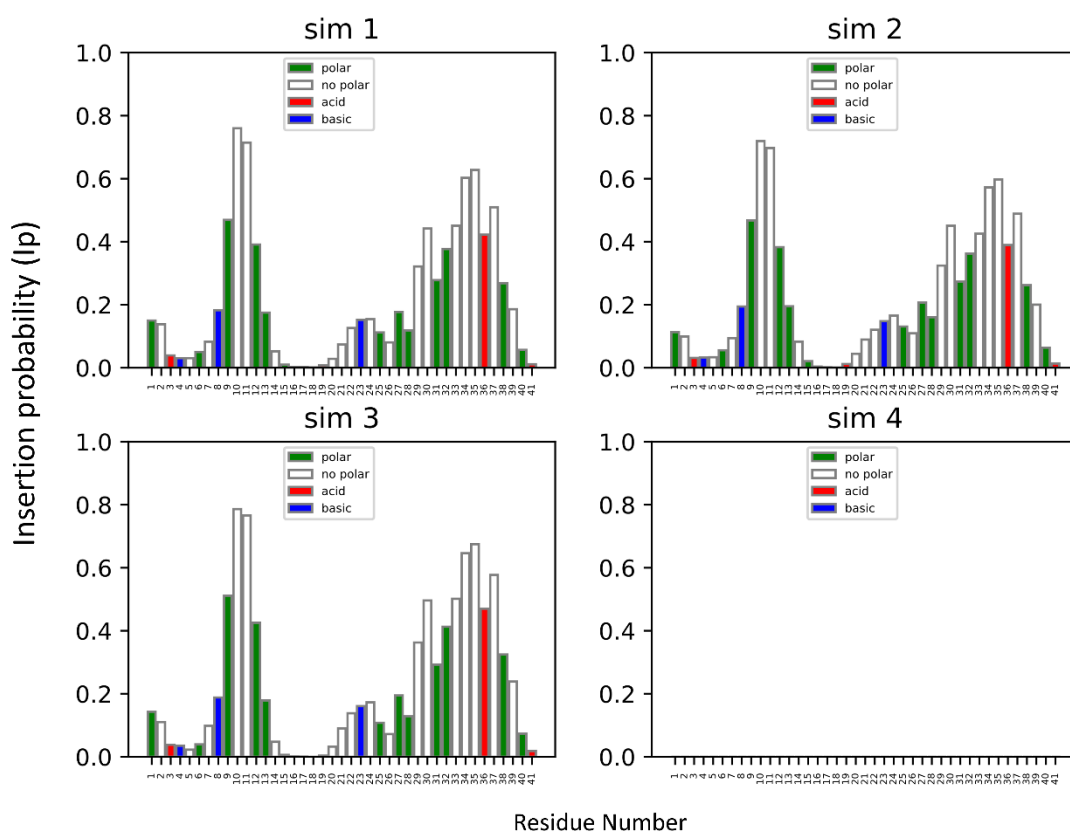

**Figure S4. Insertions probability for each CG simulation of SNX-482 in pure POPG**

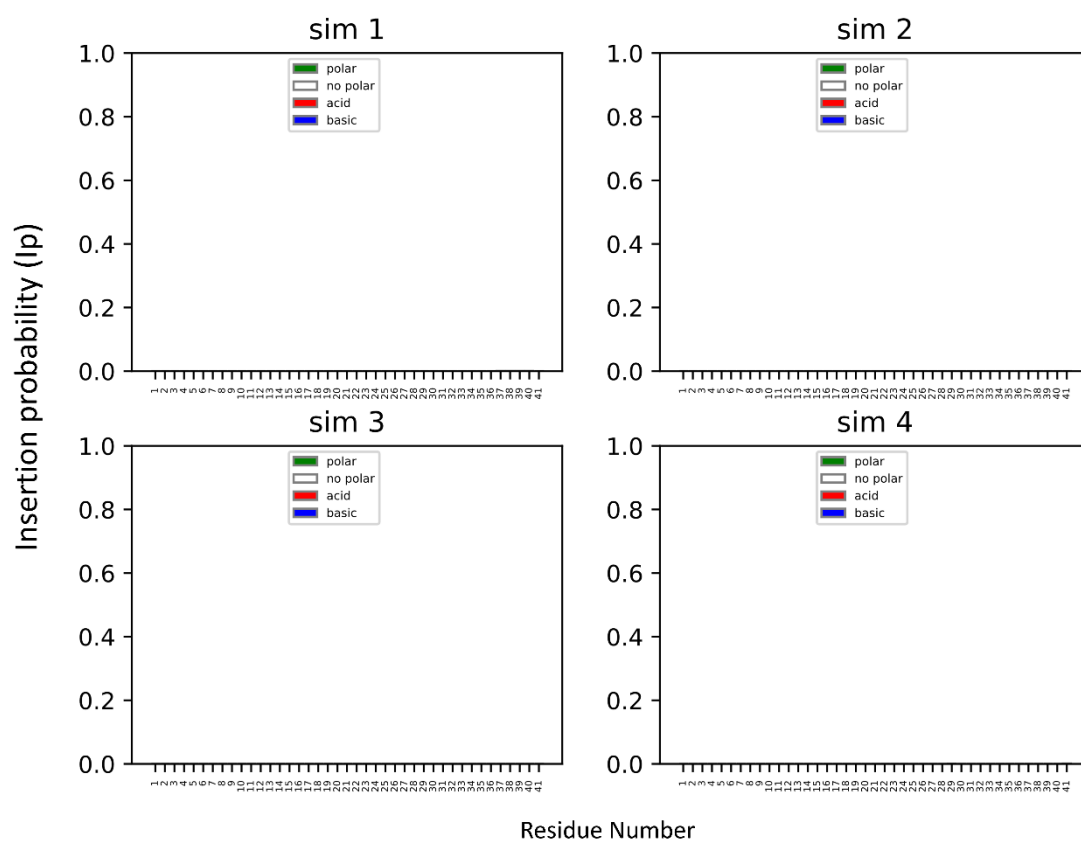

Figure S5. Insertions probability for each CG simulation of SNX-482 in pure POPC

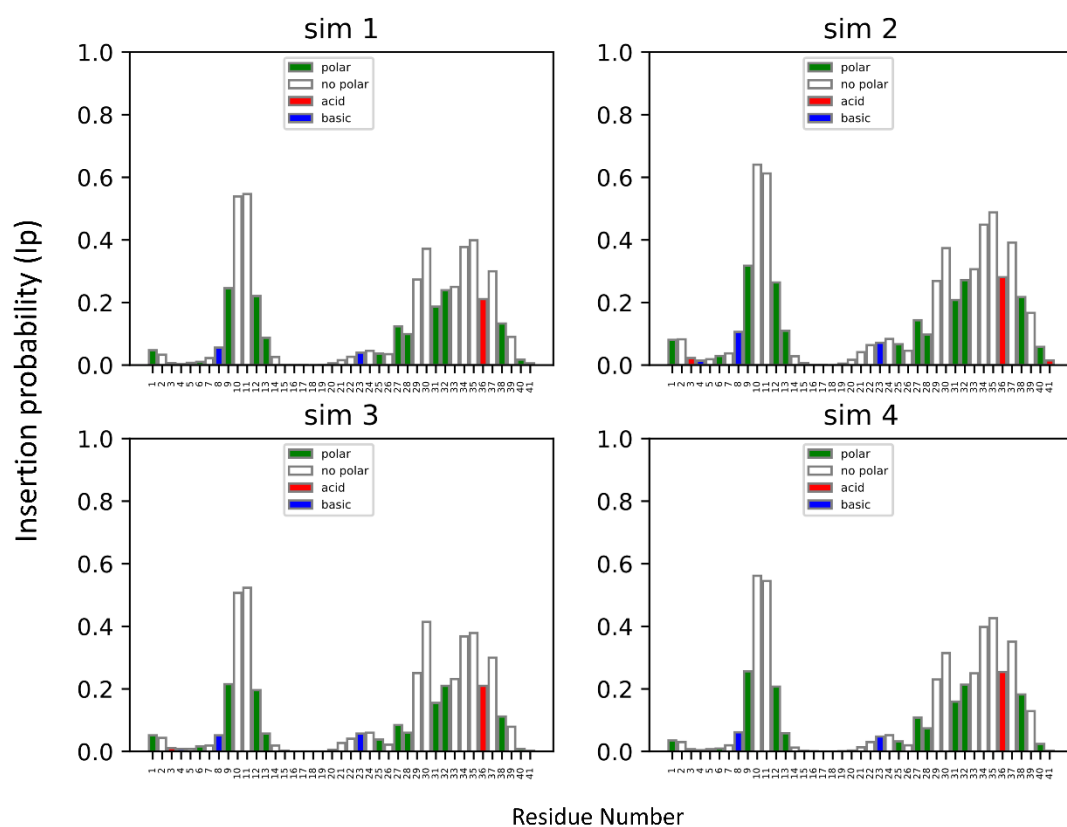

Figure S6. Insertions probability for each CG simulation of SNX-482 in POPC: POPG (3:1).



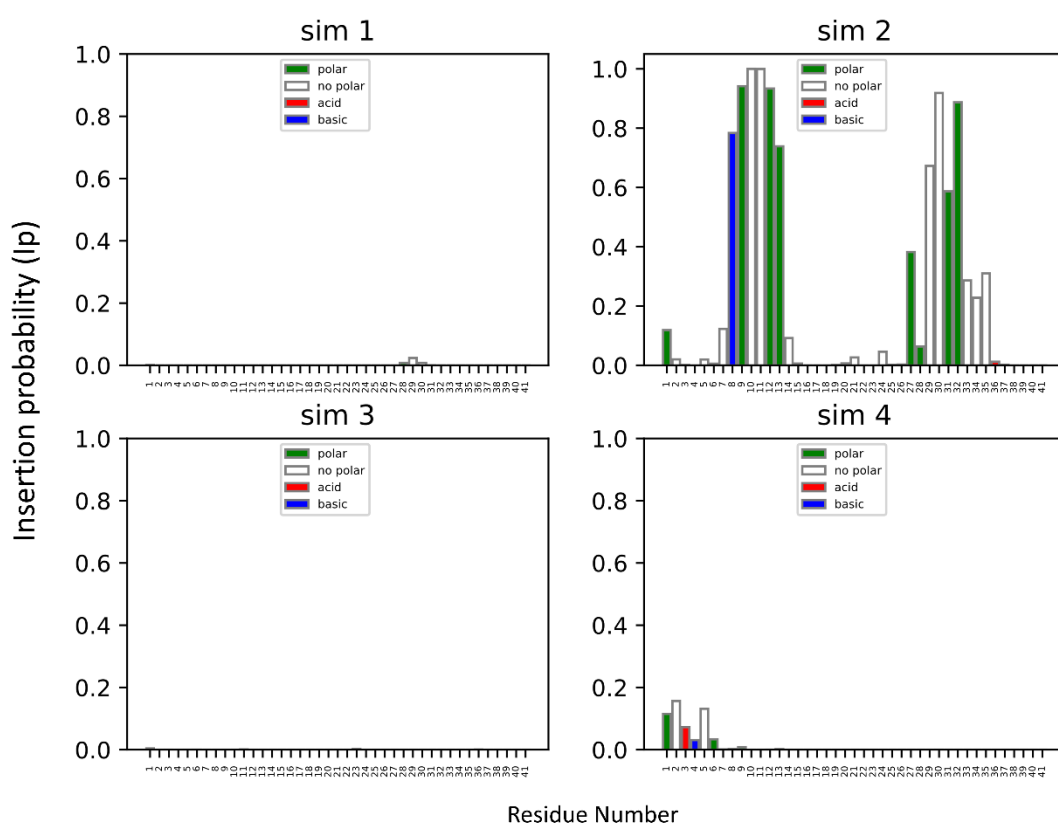

Figure S7. Insertions probability for each all-atom simulation of SNX-482 in pure POPC.

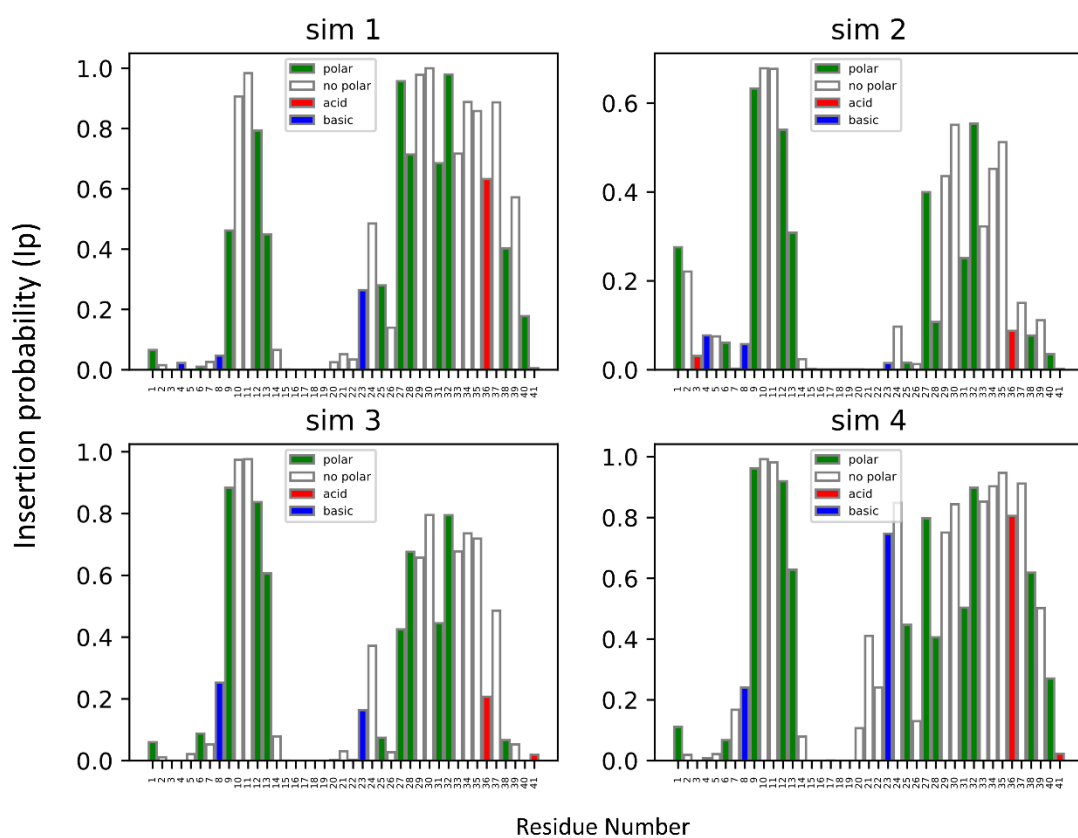

Figure S8. Insertions probability for each all-atom simulation of SNX-482 in POPC: POPG (3:1).

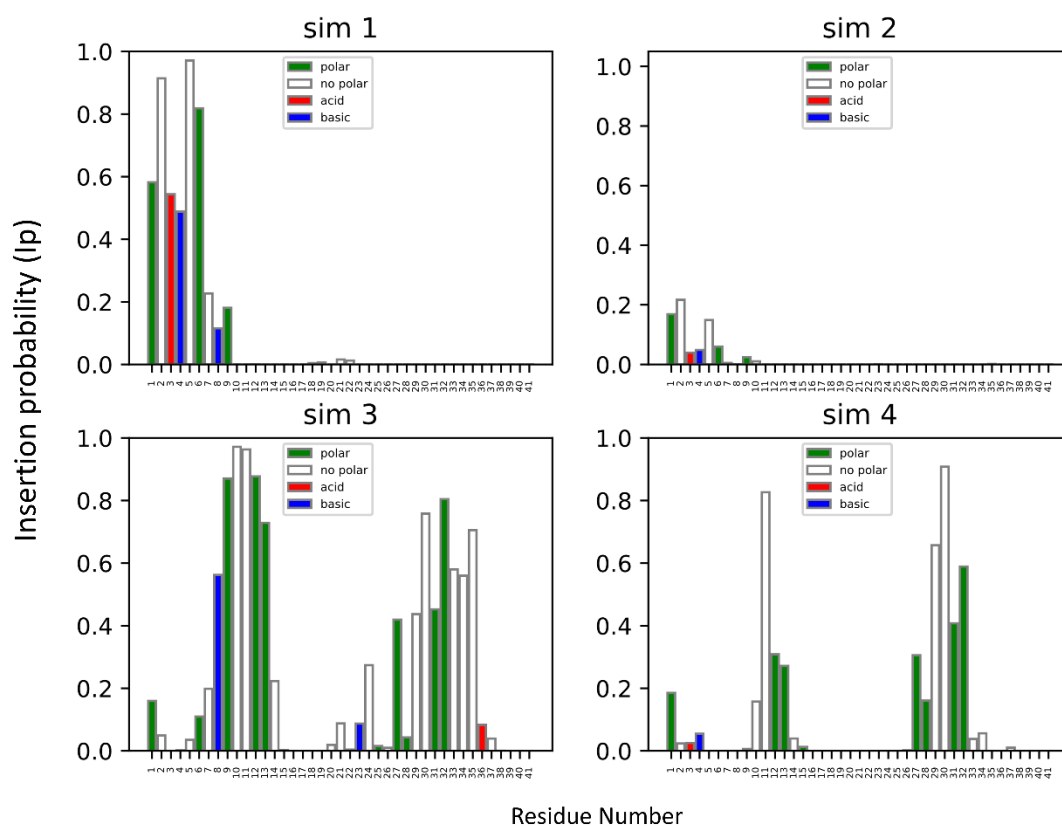

Figure S9. Insertions probability for each all-atom simulation of SNX-482 in POPC: POPG (1:3)

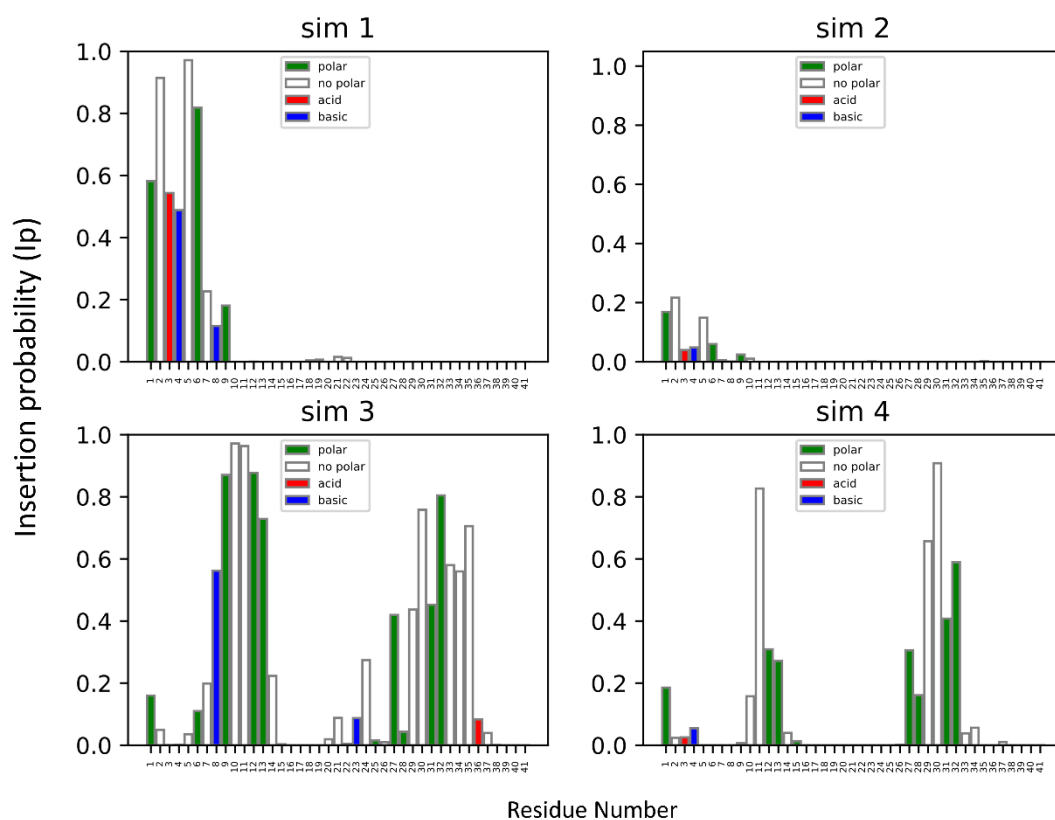

Figure S10. Insertions probability for each all-atom simulation of SNX-482 in POPC: POPG (1:1)

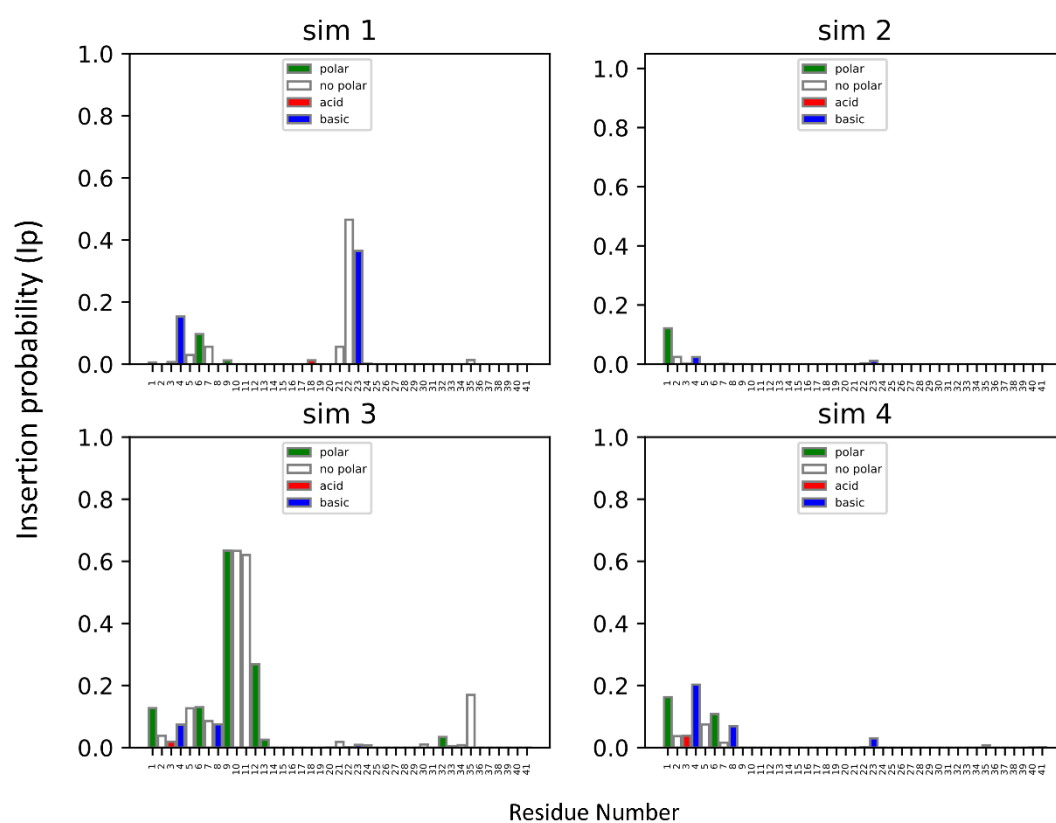

**Figure S11. Insertions probability for each all-atom simulation of SNX-482 in POPG**

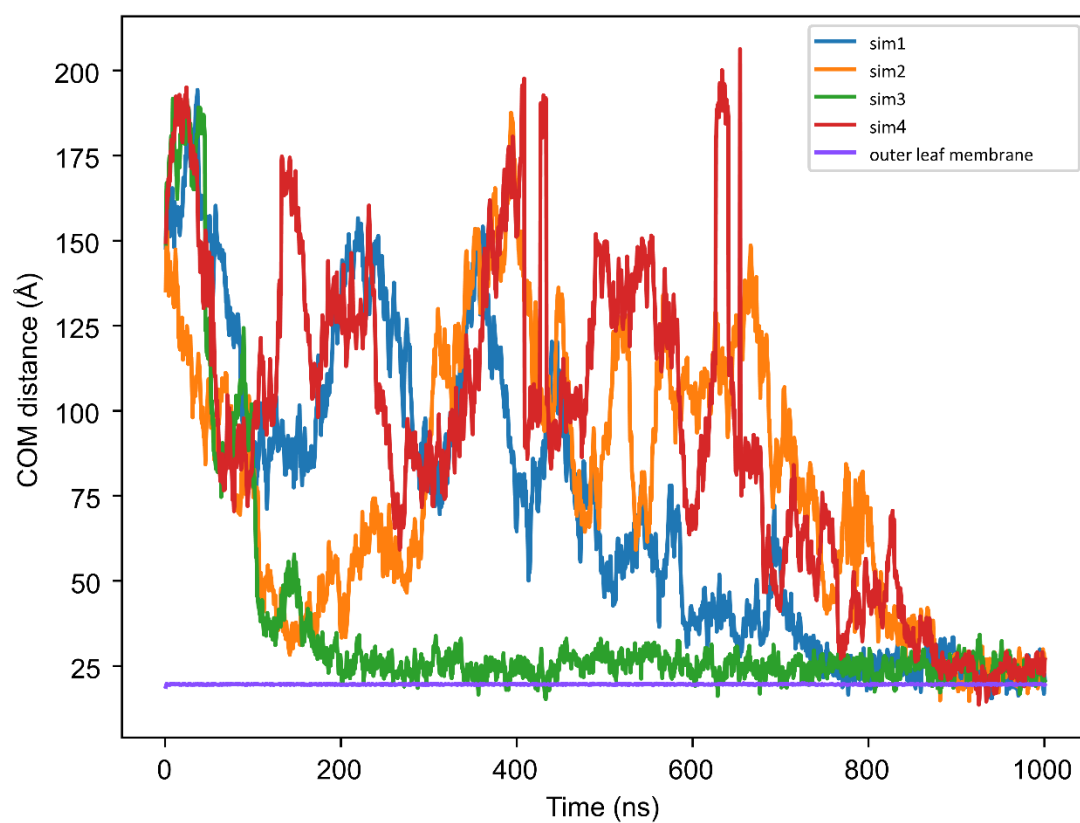

**Figure S12. COM distance between toxin and POPC: POPG (1:1) membrane in CG simulations.** The purple line is the distance from the center of mass of the membrane to the outer leaf membrane.

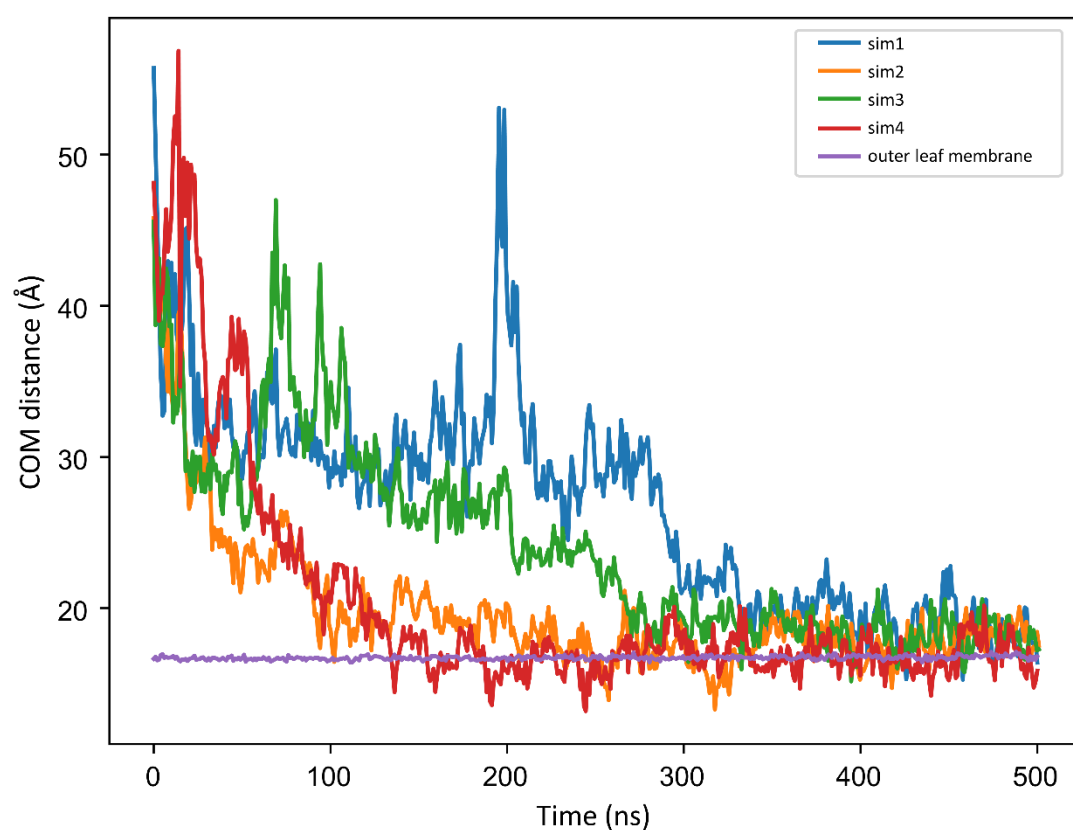

**Figure S13. COM distance between toxin and POPC: POPG (3:1) membrane in all-atom simulations.**  
The purple line is the distance from the center of mass of the membrane to the outer leaf membrane.

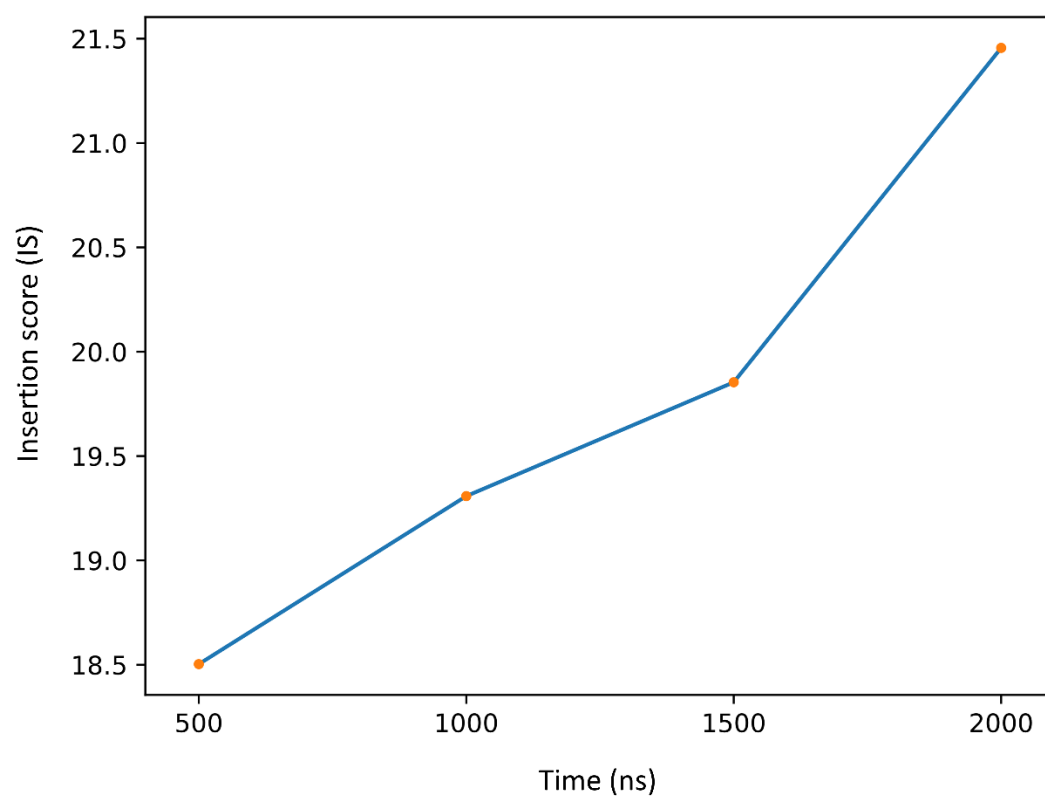

**Figure S14.** Insertions score computed for every 0.5  $\mu$ s of SNX-482 in POPC: POPG (3: 1). during 2  $\mu$ s.



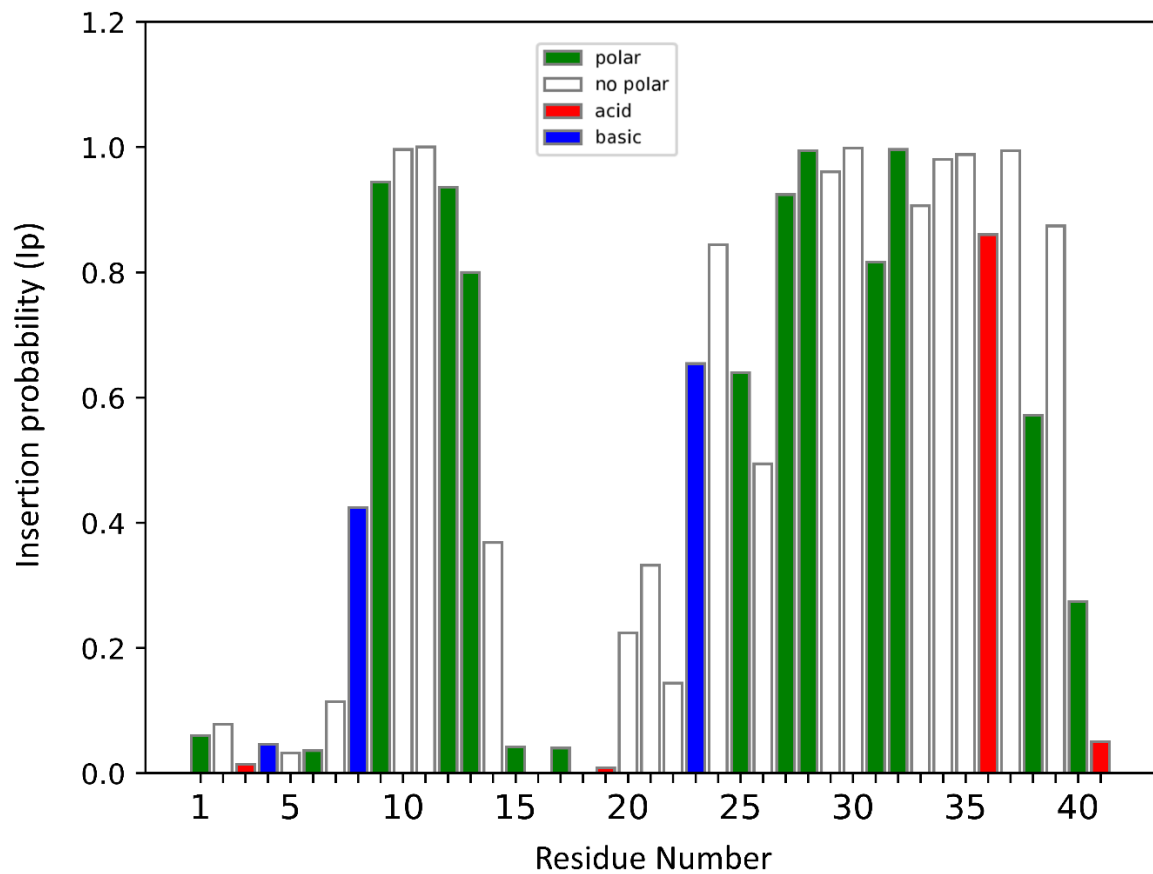

Figure S16. Insertions probability computed in the last 0.5  $\mu$ s of simulation (1.5  $\mu$ s -2  $\mu$ s) of SNX-482 and POPC: POPG (3: 1).
