# Supplementary material for: Spider Toxin SNX-482 Gating Modifier Spontaneously Partitions in the Membrane Guided by Electrostatic Interactions
Source: Preprints.org preprint supplement (doi:10.20944/preprints202112.0496.v1), 2021-12-31
Supplement: Supplementary file 2 [file supplementary]

Archive with 1 entries (1 files):
- suplementary_final.pdf
